# Supplementary material
Source: Springer Nature journal article supplement (https://www.springermedizin.de/resource/supplementary/12960_2007_112_MOESM2_ESM.pdf/9570436)

Health Worker Density per 1000 population

- Doctors
- Nurses
- Midwives

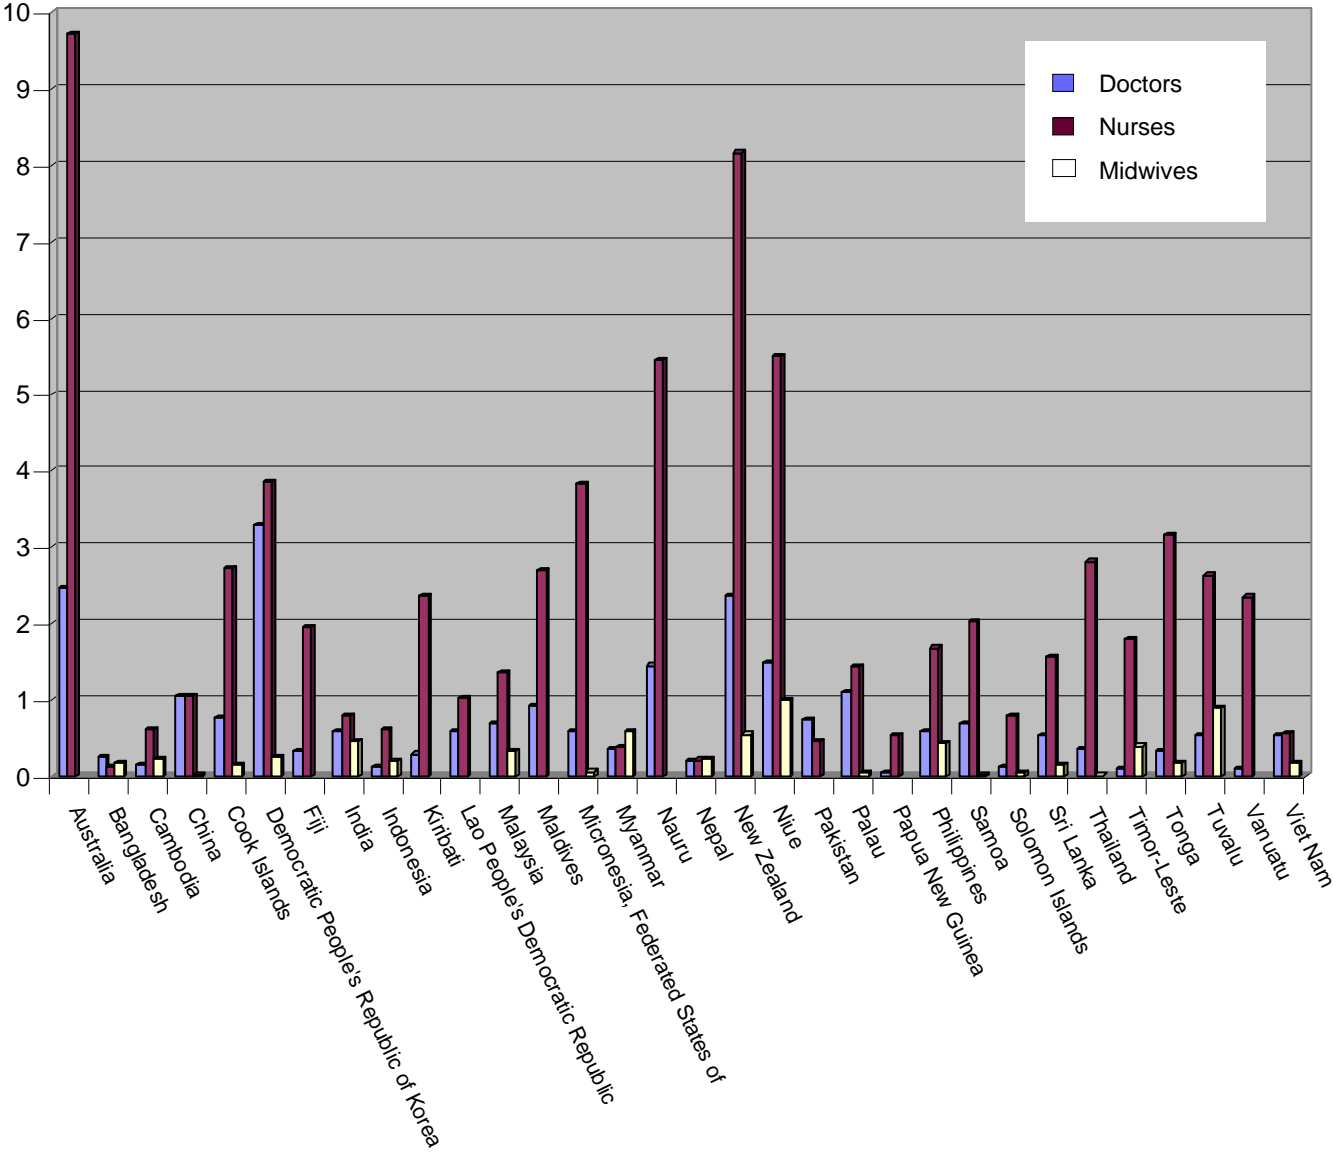

Supplement: MOESM2 [file 9570436]
